# Supplementary material
Source: PubMed Central journal article supplement (PMC3342763)
Supplement: es2043905_si_001.pdf [file es2043905_si_001.pdf]

**Supporting Information:**

# **Effect of Activated Carbon Amendment on Bacterial Community Structure and Functions in a PAH Impacted Urban Soil**

PAOLA MEYNET<sup>1</sup>, SARAH E. HALE<sup>2</sup>, RUSSELL J. DAVENPORT<sup>1</sup>, GERARD CORNELISSEN<sup>2</sup>, GIJS D. BREEDVELD<sup>2</sup> AND DAVID WERNER<sup>1,§</sup>

<sup>1</sup>*School of Civil Engineering and Geosciences, Newcastle University, Newcastle upon Tyne, NE1 7RU, England, United Kingdom*

<sup>2</sup>*Department of Environmental Engineering, Norwegian Geotechnical Institute NGI, P.O. Box 3930 Ullevål Stadion, N-0806, Oslo, Norway*

<sup>§</sup>corresponding author: Phone 0044 191 222 5099, Fax 0044 191 222 6502, e-mail: david.werner@ncl.ac.uk

Supporting information is provided as a compilation of closest relatives and their similarities with the sequence of dominant bands excised from the DGGE gels and the PAH compound specific uptake by PE in soil slurries without compared to with sodium azide addition.

| Material |                                                                                  | Page |
|----------|----------------------------------------------------------------------------------|------|
| Table S1 | Summary of the similarities for the dominant excised bands.                      | S2   |
| Table S2 | PAH uptake by PE in soil slurries without compared to with sodium azide addition | S3   |



**Table S1** Summary of the similarities for the dominant excised bands.

| Isolate | Closest relative (accession no.)                   | Similarity % | Source                                                        | Affiliation                | Class                 |
|---------|----------------------------------------------------|--------------|---------------------------------------------------------------|----------------------------|-----------------------|
| N1      | Uncultured bacterium (HQ204336)                    | 89%          | Fungal and actinobacterial communities                        | <i>Micrococcineae</i>      | <i>Actinobacteria</i> |
| N2      | Uncultured bacterium (DQ460791)                    | 86 %         | DGGE gel band from environmental sample                       | <i>Bacteroidetes</i>       | <i>Bacteroidetes</i>  |
| N3      | <i>Chryseobacterium</i> sp. (FN555401)             | 93%          | Soil                                                          | <i>Flavobacteriaceae</i>   | <i>Bacteroidetes</i>  |
| N4      | <i>Knoellia</i> sp. (EF216369)                     | 86%          | Shallow water sediment                                        | <i>Actinobacteria</i>      | <i>Actinobacteria</i> |
| N5      | <i>Stenotrophomonas</i> sp. (EU374962)             | 85%          | Zloty Stok gold mine rock biofilms                            | <i>Gammaproteobacteria</i> | <i>Proteobacteria</i> |
| N6      | <i>Curtobacterium</i> sp (GQ915093)                | 99%          | Diverticula (unpublished)                                     | <i>Microbacteriaceae</i>   | <i>Actinobacteria</i> |
| N7      | <i>Mycobacterium</i> sp. (FJ544446) <sup>1</sup>   | 96%          | Raw surface water                                             | <i>Actinomycetales</i>     | <i>Actinobacteria</i> |
|         | <i>Mycobacterium vanbaalenii</i> (JN590245)        | 92%          | Oil-containing sewage soil                                    |                            |                       |
| N8      | <i>Rhodococcus jostii</i> RHA1(JF915360.1)         | 95%          | Genomic DNA                                                   | <i>Actinobacteria</i>      | <i>Actinobacteria</i> |
| N10     | <i>Arthrobacter nitroguajacolicus</i>              | 88%          | Lespedeza root nodules                                        | <i>Micrococcineae</i>      | <i>Actinobacteria</i> |
| N11     | Uncultured bacterium (HQ015227)                    | 92%          | Landfill leachate-contaminated soil                           | <i>Proteobacteria</i>      | <i>Proteobacteria</i> |
| N12     | Uncultured bacterium (GQ289453.1)                  | 81%          | Soil for onsite wastewater treatment system                   | <i>Proteobacteria</i>      | <i>Proteobacteria</i> |
| N13     | Uncultured <i>actinobacterium</i> clone (HM106303) | 87%          | Haloalkaline lake shore sediment                              | <i>Actinobacteria</i>      | <i>Actinobacteria</i> |
| N14     | Uncultured Actinobacteria bacterium (CU918885)     | 95%          | Mesophilic anaerobic digester for municipal wastewater sludge | <i>Actinobacteria</i>      | <i>Actinobacteria</i> |
| N15     | Uncultured soil bacterium clone                    | 89%          | Uncultured soil bacterium                                     | <i>Proteobacteria</i>      | <i>Proteobacteria</i> |
| N16     | Uncultured <i>Sphingomonas</i> sp (HQ711916)       | 95%          | Drinking water                                                | <i>Alphaproteobacteria</i> | <i>Proteobacteria</i> |
| N17     | Uncultured <i>Microbacterium</i> sp (GQ365756)     | 94%          | Aeration tank for waste water treatment                       | <i>Micrococcineae</i>      | <i>Actinobacteria</i> |
| N19     | Uncultured soil bacterium (JF399957)               | 90%          | Uncultured soil bacterium                                     | <i>Proteobacteria</i>      | <i>Proteobacteria</i> |
| N20     | Uncultured bacterium clone (JF295464)              | 91%          | Soil                                                          | <i>Nitrospiraceae</i>      | <i>Nitrospiraceae</i> |
| N21     | Uncultured bacterium(FN567236)                     | 85%          | Environmental sample                                          | <i>Proteobacteria</i>      | <i>Proteobacteria</i> |
| N22     | Uncultured bacterium clone (GQ397072)              | 94%          | Soil                                                          | <i>Bacteria</i>            | <i>Bacteria</i>       |
| N23     | <i>Rhodococcus erythropolis</i> (FN386745)         | 99%          | Volcanic ash                                                  | <i>Lentzea</i> *           | <i>Actinobacteria</i> |
| N24     | Uncultured bacterium isolate DGGE band (AY894960)  | 97%          | Environmental sample                                          | <i>Proteobacteria</i>      | <i>Proteobacteria</i> |
| N26     | Streptosporangium yunnanense(AF191733)             | 87%          | Soil                                                          | <i>Actinobacteria</i>      | <i>Actinobacteria</i> |

<sup>1</sup>Ribosomal Database Project (RDP10) shows equal similarity to *Rhodococcus* family.

**Table S2** Compound specific percent reduction in PAH uptake by PE samplers embedded in soil slurries without compared to with sodium azide addition, average  $\pm$  standard deviation.<sup>a</sup>

|                      | Unamended<br>(% Reduction) | GAC<br>(% Reduction) | PAC<br>(% Reduction) |
|----------------------|----------------------------|----------------------|----------------------|
| Acenaphthylene       | 96 $\pm$ 7                 | n.d.                 | n.d.                 |
| Acenaphthene         | 100                        | 100                  | n.d.                 |
| Fluorene             | 100                        | 100                  | 51 $\pm$ 121         |
| Phenanthrene         | 97 $\pm$ 2                 | 91 $\pm$ 8           | 70 $\pm$ 30          |
| Anthracene           | 100                        | 95 $\pm$ 10          | 49 $\pm$ 124         |
| Fluoranthene         | 65 $\pm$ 8                 | 58 $\pm$ 10          | 80 $\pm$ 24          |
| Pyrene               | 47 $\pm$ 14                | 37 $\pm$ 13          | 67 $\pm$ 35          |
| Benz(a)anthracene    | 61 $\pm$ 31                | 50 $\pm$ 39          | 68 $\pm$ 34          |
| Chrysene             | 41 $\pm$ 16                | 28 $\pm$ 16          | 68 $\pm$ 32          |
| Indeno(123c,d)pyrene | 25 $\pm$ 30                | -2 $\pm$ 24          | 21 $\pm$ 56          |
| Benzo(ghi)perylene   | 33 $\pm$ 27                | 14 $\pm$ 18          | 22 $\pm$ 56          |

<sup>a</sup>n.d. means compound not detectable in both measurements, 100 means compound not detected for soil slurries without sodium azide.
